# Supplementary material
Source: Royal Society of Chemistry journal article supplement (doi:10.1039/d6gc01231k)
Supplement: d6gc01231k1.pdf [file d6gc01231k1.pdf]

# Supporting Information

## **Towards safe and sustainable ionic liquids: A critical outlook on industrial and pharmaceutical integration**

**Assya Bellaadem,<sup>a,b</sup> Roland Kalb,<sup>c,d</sup> Blaž Likozar,<sup>a</sup> Filipa A. Vicente<sup>a\*</sup>**

<sup>a</sup> **Department of catalysis and chemical engineering, National Institute of Chemistry, Ljubljana Slovenia**

<sup>b</sup> **Faculty of chemistry and chemical technology, University of Maribor, Maribor Slovenia**

<sup>c</sup> **Proionic GmbH, Raaba-Grambach, Austria**

<sup>d</sup> **Joint BioEnergy Institute, Lawrence Berkeley National Laboratory, Berkeley, USA**

**\*Corresponding author: [filipa.andre.vicente@ki.si](mailto:filipa.andre.vicente@ki.si)**

Table S 1: Structures of cations discussed in the review

|                                                |                                                                                      |
|------------------------------------------------|--------------------------------------------------------------------------------------|
| <p>1-(2-Methoxyethyl)-3-methylimidazolium</p>  | 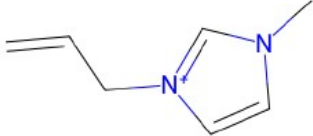   |
| <p>1-(3-Hydroxypropyl)-3-methylimidazolium</p> |    |
| <p>3-Butyl-1-phenylimidazolium</p>             |    |
| <p>1-Dodecyl-3-methylimidazolium</p>           |   |
| <p>1-Ethyl-3-methylimidazolium</p>             |  |
| <p>1-Hexyl-3-methylimidazolium</p>             |  |
| <p>1,3-dimethylimidazolium</p>                 |  |
| <p>1-Octyl-3-methylimidazolium</p>             |  |

|                                    |                                                                                      |
|------------------------------------|--------------------------------------------------------------------------------------|
| 2-Methoxyethyl-3-methylimidazolium | 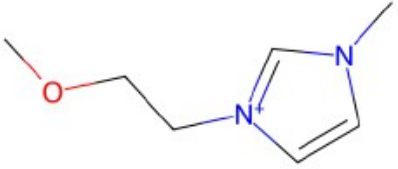   |
| Hydroxypropylmethylimidazolium     |    |
| 1-Butylpyridinium                  |    |
| 1-Butyl-1-methylpyrrolidinium      |   |
| 4-Methyl-N-butylpyridinium         |  |
| Benzylammonium                     |  |
| Diethanolammonium                  |  |
| Diethylammonium                    |  |

|                                |                                                                                      |
|--------------------------------|--------------------------------------------------------------------------------------|
| Diisopropylammonium            | 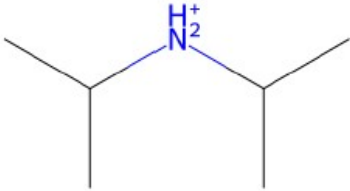   |
| Ethylammonium                  |    |
| Monoethanolammonium            |    |
| Monoethylammonium              |    |
| N,N,N-Trimethylethanolammonium |   |
| Triethanolammonium             |  |
| Triethylammonium               |  |
| Benzalkonium                   |  |

|                                    |                                                                                      |
|------------------------------------|--------------------------------------------------------------------------------------|
| <p>Imidazolium</p>                 | 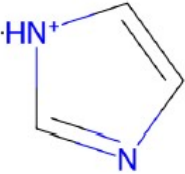   |
| <p>Phosponium</p>                  |    |
| <p>Cholinium</p>                   |    |
| <p>Glycine betaine</p>             |   |
| <p>L-Phenylalanine ethyl ester</p> |  |
| <p>L-Methionine ethyl ester</p>    |  |
| <p>L-Leucine ethyl ester</p>       |  |
| <p>L-Aspartic acid ethyl ester</p> |  |

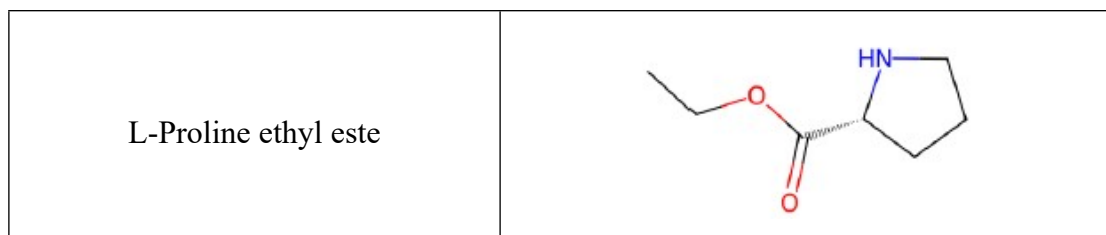

Table S 2: Structures of anions discussed in the review

|                      |                                                                                      |
|----------------------|--------------------------------------------------------------------------------------|
| Chloride             | Cl <sup>-</sup>                                                                      |
| Bromide              | Br <sup>-</sup>                                                                      |
| Nitrate              | 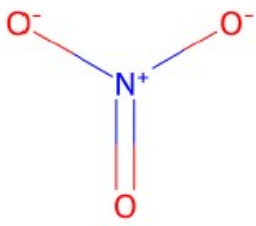  |
| Dihydrogen phosphate |  |
| Hydrogensulfate      |  |
| Hexafluorophosphate  |  |

|                   |                                                                                      |
|-------------------|--------------------------------------------------------------------------------------|
| Tetrafluoroborate | 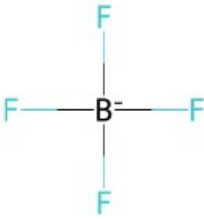   |
| Ethyl sulfate     |    |
| Methyl sulfate    |    |
| Octyl sulfate     |   |
| Acetate           |  |
| Benzoate          |  |
| Butanoate         |  |
| Propanoate        |  |

|                   |                                                                                      |
|-------------------|--------------------------------------------------------------------------------------|
| Lactate           | 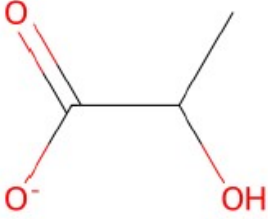   |
| Levulinate        |    |
| Glycolate         |    |
| Salicylate        |   |
| Indole-3-butyrate |  |
| Succinate         |  |
| Fumarate          |  |

|                                   |                                                                                      |
|-----------------------------------|--------------------------------------------------------------------------------------|
| Citrate                           | 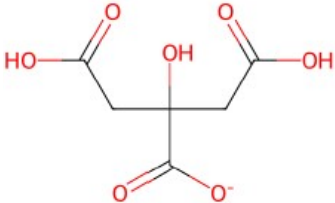   |
| Tartrate                          |    |
| Bitartrate                        |    |
| Dicyanamide                       |   |
| Fluoroacetate                     |  |
| Bis(trifluoromethyl)imide         |  |
| Bis(trifluoromethylsulfonyl)imide |  |

|                 |                                                                                                                                                                                                                                                                                                                                                                                                                                       |
|-----------------|---------------------------------------------------------------------------------------------------------------------------------------------------------------------------------------------------------------------------------------------------------------------------------------------------------------------------------------------------------------------------------------------------------------------------------------|
| L-Glutamate     | 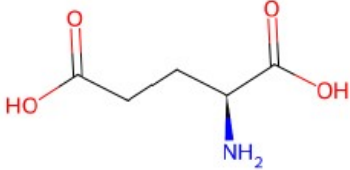 <p>The structure shows a five-carbon chain. The first carbon is part of a carboxyl group (HO-C=O). The second carbon is a methylene group. The third carbon is a methylene group. The fourth carbon is a chiral center with an amino group (NH<sub>2</sub>) attached with a wedge bond. The fifth carbon is part of a carboxyl group (C=O-OH).</p> |
| L-Phenylalanine |  <p>The structure shows a central chiral carbon with a wedge bond to an amino group (NH<sub>2</sub>). To the left is a carboxyl group (HO-C=O). To the right is a methylene group, which is further connected to a benzene ring.</p>                                                                                                                |
| Bicarbonate     |  <p>The structure shows a central carbon atom double-bonded to an oxygen atom (O) and single-bonded to a hydroxyl group (HO) and an oxygen atom with a negative charge (O<sup>-</sup>).</p>                                                                                                                                                         |
